# Supplementary material for: Evaluation of a dill (Anethum graveolens L.) gene bank germplasm collection using multivariate analysis of morphological traits, molecular genotyping and chemical composition to identify novel genotypes for plant breeding
Source: PeerJ. 2023 Mar 29;11:e15043. doi: 10.7717/peerj.15043 (PMC10066692; doi:10.7717/peerj.15043)
Supplement: Supplemental Information 1 [file peerj-11-15043-s001.xlsx]

## Sheet: Table S2
Supplemental Data S1: Phenotypic characterization of germplasm collection based on twenty-two morphological descriptors of UPOV
			Young Plant			Plant			Stem				Leaf								Umbel
			1	2	3	4	5	6	7	8	9	10	11	12	13	14	15	16	17	18	19	20	21	22
			YPAC	YPAL	PDF	PNPB	PH	PLMS	SD	SBH	SIG	SWAX	LS	LDF	LWS	LL	LW	LBH	LIG	LWAX	UD	UNP	UTAMU	UTBF
			Young plant= anthocyanin coloration	Young plant= attitude of leaves	Plant= Density of foliage	Plant= Number of primary branches	Plant= height	Plant= Length of main stem	Stem= diameter	Stem= Blue hue on stem	Stem= Intensity of green color on stem	Stem= waxiness	Leaf= shape	Leaf= Density of feathering	Leaf= width of segments	Leaf= length	Leaf= width	;eaf= Blue hue	Leaf= Intensity of green color	Leaf= waxiness	Umbel= main umbel diameter	Umbel= number of peduncles	Umbel= time of appearance of main umbel	Umbel= time of beginning of flowering
		Classes	1=absent	1=erect	3= loose	3=few	3=short	3=short	3=small	1=absent	3=light	1=absent or very weak	1=triangular	3=loose	3=narrow	3=short	3=narrow	1=absent	3=light	3=weak	3=small	3=few	3=early	3=early
			9=present	3= semi-erect	5= medium	5=medium	5=medium	5=medium	5=medium	9=present	5=medium	3=weak	2=rhomboidal	5=medium	5=medium	5=medium	5=medium	9=present	5=medium	5=medium	5=medium	5=medium	5=medium	5=medium
				5=horizontal	7=dense	7=many	7=tall	7=long	7=large		7=dark	5=medium	3=oblong	7=dense	7=broad	7=long	7=broad		7=dark	7=strong	7=large	7=many	7=late	7=late
												7=strong
												9=very strong
Α/Α
1	Landraces	T-518/06	1	1	5	3	7	7	3	1	5	5	2	5	7	3	5	1	5	3	7	7	3	3
2		HL-232/07	1	1	3	5	5	5	7	1	5	5	2	3	5	5	7	1	7	5	7	7	5	3
3		T-208/06	1	1	7	5	7	7	7	1	5	5	2	5	5	5	7	1	7	5	7	7	5	3
4		T-538/06	1	3	7	5	7	7	7	1	5	5	2	7	5	5	7	1	5	7	7	7	3	3
5		T-370/06	1	1	7	7	7	7	7	1	5	5	2	5	7	5	7	1	7	3	7	7	3	3
6		T-349/06	1	1	5	5	7	7	5	1	5	5	3	5	7	5	3	1	5	5	7	7	3	3
7		GRC-209/08	1	1	5	5	7	7	7	1	5	5	2	5	7	7	7	1	5	3	7	7	5	3
8		GRC-1348/04	1	1	5	5	7	7	7	1	5	5	2	5	7	5	7	1	5	3	7	7	5	3
9		IS-127/07	1	3	3	5	7	7	7	1	5	5	2	5	7	7	5	1	5	3	7	7	3	3
10		T-326/06	1	1	3	5	7	7	7	1	5	5	2	7	7	5	7	1	5	3	7	7	3	3
11		T-315/06	1	1	5	7	7	7	7	1	5	7	2	7	5	5	7	1	5	5	7	7	3	3
12		T-309/06	1	3	5	7	7	7	7	1	5	5	2	7	7	5	7	1	5	3	7	7	3	3
13		T-269/06	1	1	3	5	7	7	7	1	5	5	2	5	5	5	3	1	5	3	7	7	5	5
14		KD-178/07	1	3	3	3	7	7	7	1	5	7	1	3	7	5	7	1	7	7	7	7	3	3
15		XKA-035/07	1	3	5	5	7	7	5	1	5	5	3	7	5	5	3	1	5	3	7	5	7	7
16		T-382/06	1	3	7	5	7	7	7	1	5	5	1	7	5	7	5	1	5	7	7	7	3	3
17		ROX-064/07	1	1	3	5	7	7	5	1	5	7	2	5	5	7	5	1	5	5	7	7	3	5
18		ANP-015/07	1	1	5	5	7	7	7	1	5	5	2	5	7	7	7	1	5	5	7	7	5	7
19		T-399/06	1	3	7	5	7	5	7	1	5	5	1	7	5	3	5	1	5	5	7	7	3	3
20		KD-235/07	9	3	5	5	7	7	7	1	5	7	2	5	5	7	7	1	7	7	7	5	3	3
21		SAS-049/07	1	1	3	5	7	7	7	1	5	5	3	5	5	7	5	1	5	7	7	7	7	7
22		K-133/06	1	1	7	5	5	7	7	1	5	5	2	7	5	7	7	1	5	5	7	7	5	5
23	Cultivars	Szmaragd	9	1	5	5	7	7	7	1	5	7	2	5	5	3	3	1	5	7	7	7	7	7
24		Diana	9	1	5	5	7	7	7	1	5	5	2	5	5	3	3	1	5	7	7	7	5	5
25		Mariska	9	1	5	5	7	7	7	1	5	5	3	5	5	3	3	1	5	7	7	7	5	5
26		Tetra	9	1	5	5	7	7	7	1	5	5	3	5	5	3	3	1	5	5	7	7	5	5
27		Dukat	9	1	5	5	7	7	7	1	7	7	2	5	5	5	5	1	5	5	7	7	7	7
28		Kronos	1	5	7	5	3	3	7	1	7	9	1	5	7	5	5	9	7	7	7	7	5	5
29		Ambrozja	9	1	5	3	5	5	5	9	5	9	1	5	5	5	5	9	5	7	7	7	5	5
30		Lukullus	1	5	5	3	5	5	5	1	7	5	1	5	5	5	5	9	7	7	7	7	5	5
31		Amat	1	3	5	3	7	7	5	1	5	5	1	3	5	5	5	9	5	7	5	7	5	5
		SUM of genotypes in each class	1=21	1=14	3=7	3=2	3=0	3=1	3=1	1=22	3=0	3=0	1=3	3=2	3=0	3=2	3=3	1=22	3=0	3=9	3=0	3=0	3=13	3=16
			9=1	3=8	5=9	5=17	5=2	5=2	5=3	9=0	5=22	5=18	2=16	5=12	5=12	5=12	5=6	9=0	5=17	5=8	5=0	5=2	5=7	5=3
				5=0	7=6	7=3	7=20	7=19	7=18		7=0	7=4	3=3	7=8	7=10	7=8	7=13		7=5	7=5	7=22	7=20	7=2	7=3
