# Supplementary material for: Evaluation of a dill (Anethum graveolens L.) gene bank germplasm collection using multivariate analysis of morphological traits, molecular genotyping and chemical composition to identify novel genotypes for plant breeding
Source: PeerJ. 2023 Mar 29;11:e15043. doi: 10.7717/peerj.15043 (PMC10066692; doi:10.7717/peerj.15043)
Supplement: Supplemental Information 2 [file peerj-11-15043-s002.xlsx]

## Sheet: Table S3
Supplemental Data S2: Correlation matrix (Spearman) for the evaluation the relationship between the morphological descriptors.
Variables	YPAC	YPAL	PDF	PNPB	PH	PLMS	SD	SBH	SIG	SWAX	LS	LDF	LWS	LL	LW	LBH	LIG	LWAX	UD	UNP	UTAMU	UTBF
YPAC	1	-0.246128	0.0340469	-0.0788031	0.0337496	0.0337496	0.112642	0.338062	0.0841794	0.383549	0.178709	-0.17863	-0.40052	-0.387805	-0.415922	0.0222718	-0.107143	0.406391	0.0986013	-0.172219	0.317674	0.384476
YPAL	-0.246128	1	0.168003	-0.204593	-0.167876	-0.331063	-0.0911043	-0.133477	0.340826	0.0680251	-0.512885	0.144804	0.0268852	0.109894	0.027739	0.415696	0.312787	0.299583	-0.218417	-0.314169	-0.186964	-0.144037
PDF	0.0340469	0.168003	1	0.187241	-0.171693	-0.0435904	0.0832914	0.0115099	0.18572	-0.046684	-0.16487	0.352598	-0.0680052	-0.0773598	0.138868	0.169856	0.141051	0.207019	-0.0115099	-0.0165558	0.0851101	-0.0765706
PNPB	-0.0788031	-0.204593	0.187241	1	0.282087	0.282087	0.564602	-0.346324	-0.175127	-0.102891	0.422181	0.475466	0.0885383	0.112164	0.221608	-0.533546	-0.0900607	-0.377474	0.346324	-0.0383192	-0.157651	-0.18157
PH	0.0337496	-0.167876	-0.171693	0.282087	1	0.777778	0.15506	-0.399331	-0.477291	-0.240372	0.392232	0.116685	0.11797	-0.0770597	-0.0862156	-0.631397	-0.404995	-0.271428	-0.0798661	-0.114879	-0.215068	-0.16061
PLMS	0.0337496	-0.331063	-0.0435904	0.282087	0.777778	1	0.15506	-0.399331	-0.477291	-0.240372	0.533872	0.116685	0.11797	0.175136	0.0355005	-0.631397	-0.404995	-0.271428	-0.0798661	-0.114879	-0.07458	-0.0251767
SD	0.112642	-0.0911043	0.0832914	0.564602	0.15506	0.15506	1	-0.322677	-0.0754578	-0.0442177	0.074323	0.153318	0.0518072	0.0822955	0.353676	-0.458438	0.112642	-0.0180449	0.322677	0.161439	0.0476811	-0.166991
SBH	0.338062	-0.133477	0.0115099	-0.346324	-0.399331	-0.399331	-0.322677	1	-0.0597614	0.387083	-0.281935	-0.060388	-0.135401	-0.0226596	-0.0656167	0.474342	-0.0986013	0.205306	0.0333333	0.0479463	0.0897618	0.123558
SIG	0.0841794	0.340826	0.18572	-0.175127	-0.477291	-0.477291	-0.0754578	-0.0597614	1	0.335024	-0.322936	-0.108266	-0.0147122	-0.0406251	-0.11764	0.524951	0.345135	0.226015	0.0597614	0.0859602	0.288331	0.322211
SWAX	0.383549	0.0680251	-0.046684	-0.102891	-0.240372	-0.240372	-0.0442177	0.387083	0.335024	1	-0.331099	-0.170829	-0.108437	0.042002	0.0110185	0.295464	0.219977	0.390537	0.106782	-0.124795	-0.00666692	0.193843
LS	0.178709	-0.512885	-0.16487	0.422181	0.392232	0.533872	0.074323	-0.281935	-0.322936	-0.331099	1	0.0991323	-0.0260278	-0.055642	-0.246164	-0.594371	-0.317704	-0.322091	0.281935	-0.23656	0.149495	0.184137
LDF	-0.17863	0.144804	0.352598	0.475466	0.116685	0.116685	0.153318	-0.060388	-0.108266	-0.170829	0.0991323	1	-0.098119	0.0590606	0.105069	-0.273715	-0.413401	-0.221902	0.338173	-0.156351	-0.181894	-0.137457
LWS	-0.40052	0.0268852	-0.0680052	0.0885383	0.11797	0.11797	0.0518072	-0.135401	-0.0147122	-0.108437	-0.0260278	-0.098119	1	0.125514	0.339228	-0.0843374	0.083225	-0.458876	0.135401	0.194759	-0.418478	-0.406494
LL	-0.387805	0.109894	-0.0773598	0.112164	-0.0770597	0.175136	0.0822955	-0.0226596	-0.0406251	0.042002	-0.055642	0.0590606	0.125514	1	0.441738	-0.0477706	0.0526649	-0.063977	0.0226596	-0.171115	-0.0306325	-0.0390409
LW	-0.415922	0.027739	0.138868	0.221608	-0.0862156	0.0355005	0.353676	-0.0656167	-0.11764	0.0110185	-0.246164	0.105069	0.339228	0.441738	1	-0.138332	0.360466	-0.172911	0.0656167	0.0471912	-0.385454	-0.538517
LBH	0.0222718	0.415696	0.169856	-0.533546	-0.631397	-0.631397	-0.458438	0.474342	0.524951	0.295464	-0.594371	-0.273715	-0.0843374	-0.0477706	-0.138332	1	0.252413	0.432824	-0.474342	0.10108	0.189234	0.260483
LIG	-0.107143	0.312787	0.141051	-0.0900607	-0.404995	-0.404995	0.112642	-0.0986013	0.345135	0.219977	-0.317704	-0.413401	0.083225	0.0526649	0.360466	0.252413	1	0.223744	0.0986013	-0.172219	-0.118535	-0.251571
LWAX	0.406391	0.299583	0.207019	-0.377474	-0.271428	-0.271428	-0.0180449	0.205306	0.226015	0.390537	-0.322091	-0.221902	-0.458876	-0.063977	-0.172911	0.432824	0.223744	1	-0.205306	0.0155427	0.221285	0.282019
UD	0.0986013	-0.218417	-0.0115099	0.346324	-0.0798661	-0.0798661	0.322677	0.0333333	0.0597614	0.106782	0.281935	0.338173	0.135401	0.0226596	0.0656167	-0.474342	0.0986013	-0.205306	1	-0.0479463	-0.0897618	-0.123558
UNP	-0.172219	-0.314169	-0.0165558	-0.0383192	-0.114879	-0.114879	0.161439	0.0479463	0.0859602	-0.124795	-0.23656	-0.156351	0.194759	-0.171115	0.0471912	0.10108	-0.172219	0.0155427	-0.0479463	1	-0.0645562	-0.0888623
UTAMU	0.317674	-0.186964	0.0851101	-0.157651	-0.215068	-0.07458	0.0476811	0.0897618	0.288331	-0.00666692	0.149495	-0.181894	-0.418478	-0.0306325	-0.385454	0.189234	-0.118535	0.221285	-0.0897618	-0.0645562	1	0.74814
UTBF	0.384476	-0.144037	-0.0765706	-0.18157	-0.16061	-0.0251767	-0.166991	0.123558	0.322211	0.193843	0.184137	-0.137457	-0.406494	-0.0390409	-0.538517	0.260483	-0.251571	0.282019	-0.123558	-0.0888623	0.74814	1
Values in bold are different from 0 with a significance level alpha=0,05
Significant (strongly and moderately) positive and negative correlations are presented in yellow and red colour, respectively.
